# Supplementary material for: HELPing older people with very severe chronic obstructive pulmonary disease (HELP-COPD): mixed-method feasibility pilot randomised controlled trial of a novel intervention
Source: PubMed Central journal article supplement — NPJ Prim Care Respir Med. 2015 Apr 16;25:15020–. doi: 10.1038/npjpcrm.2015.20 (PMC4532154; doi:10.1038/npjpcrm.2015.20), 2015-04-16
Supplement: npjpcrm201520-s2.pdf [file npjpcrm201520-s2.pdf]

# HELP-COPD record

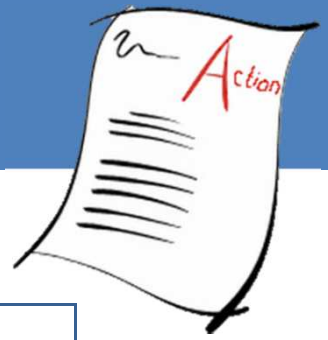

This is a record of a conversation I had

|                                       |                |    |                  |
|---------------------------------------|----------------|----|------------------|
| With                                  | Susie Ferguson | on | __ / ____ / ____ |
| at                                    |                |    |                  |
| My carer, _____, was present with me. |                |    |                  |

Suggested actions we agreed:

|  | Who will do this? | I will tick when complete |
|--|-------------------|---------------------------|
|  |                   |                           |

*See overleaf for a full summary*

This conversation happened because I was admitted to hospital due to my breathing problems. I was admitted on \_\_ / \_\_\_\_ / \_\_\_\_ .

The aim of this conversation was to understand how I manage with my breathing problems at home and to agree a plan of actions that might help me.

\_\_\_\_\_ Susie Ferguson \_\_\_\_\_ will contact me in 1 month, 3 months and again in 6 months time, to review these actions.

My GP will receive a copy of this document.

My CHI number is

My date of birth is \_\_ / \_\_ / \_\_\_\_
